# Supplementary material
Source: PubMed Central journal article supplement (PMC8259490)
Supplement: CJN.16091020SupplementaryData.pdf [file CJN.16091020SupplementaryData.pdf]

## **Supplementary Data**

**Supplementary Table 1.** Cognitive testing scores by gait phenotype and CKD status.

**Supplementary Table 2.** MNI coordinates of key brain regions (peak voxels in clusters) contributing to the gray matter volume covariance network associated with Chronic Kidney Disease.

**Supplementary Table 3.** MNI coordinates of key brain regions (peak voxels in clusters) contributing to the gray matter volume covariance network associated with the gait phenotype.

**Supplementary Appendix 1.** MRI pre-processing pipeline and multivariate analyses.

**Supplementary Table 1. Cognitive Testing Scores by Gait Phenotype and CKD Status**

| Cognitive Test                              | No CKD                       |                            | CKD                         |                            |
|---------------------------------------------|------------------------------|----------------------------|-----------------------------|----------------------------|
|                                             | No Gait Phenotype<br>(N=109) | + Gait Phenotype<br>(N=77) | No Gait Phenotype<br>(N=38) | + Gait Phenotype<br>(N=88) |
| <b><u>RBANS</u></b>                         |                              |                            |                             |                            |
| Total Scale                                 | 94.9 ± 12.5                  | 93.9 ± 11.6                | 94.8 ± 13.3                 | 89.3 ± 10.8                |
| <i>Subdomain Scores</i>                     |                              |                            |                             |                            |
| Immediate Memory                            | 101.9 ± 12.4                 | 101.9 ± 12.4               | 99.8 ± 11.6                 | 95.7 ± 11.6                |
| Visuospatial /<br>Constructional            | 94.7 ± 11.7                  | 91.6 ± 14.4                | 94.9 ± 12.7                 | 88.8 ± 14.4                |
| Language                                    | 92.5 ± 11.3                  | 93.6 ± 10.5                | 92.8 ± 10.6                 | 94.2 ± 9.0                 |
| Attention                                   | 101.9 ± 13.2                 | 101.0 ± 13.5               | 100.8 ± 13.9                | 97.6 ± 14.4                |
| Delayed Memory                              | 95.8 ± 11.7                  | 95.3 ± 11.1                | 96.6 ± 12.8                 | 90.9 ± 10.0                |
| <b><u>Individual Cognitive Tests</u></b>    |                              |                            |                             |                            |
| FCSRT (free recall) –<br>n=307              | 32.6 ± 6.9                   | 30.9 ± 6.8                 | 30.8 ± 6.6                  | 28.8 ± 6.3                 |
| FCSRT (total recall ≤ 44)<br>– n(%), n=310  | 3 (3)                        | 3 (4)                      | 1 (3)                       | 1 (1)                      |
| Letter Fluency (z score)                    | 0.2 ± 1.0                    | 0.2 ± 1.1                  | 0.2 ± 1.2                   | - 0.1 ± 1.2                |
| Category Fluency (z score)                  | 0.6 ± 1.2                    | 0.2 ± 1.3                  | 0.3 ± 1.2                   | -0.1 ± 1.2                 |
| Trail Making Test A (z<br>score)            | 0.66 (0.10-1.13)             | 0.64 (0.09-1.02)           | 0.90 (0.55-1.13)            | 0.50 (-0.35-0.77)          |
| Trail Making Test B (z<br>score) – n=307    | 0.54 (-0.05-1.05)            | 0.25 (-0.52-0.83)          | 0.53 (0.18-1.13)            | 0.00 (-0.97-0.63)          |
| Trail Making Test Δ* (sec)<br>– n=307       | 55.4 (37.5-77.3)             | 67.2 (40.7-102.2)          | 51.1 (36.6-94.3)            | 77.4 (49.7-119.8)          |
| Digit Symbol Substitution<br>(scaled score) | 11.5 ± 2.9                   | 11.4 ± 3.3                 | 11.9 ± 2.9                  | 10.7 ± 3.1                 |
| Boston Naming Test (z<br>score) – n= 308    | 0.5 (-0.4-1.0)               | 0.4 (-0.5-0.8)             | 0.7 (-0.1-1.0)              | 0.4 (-0.1-0.9)             |

---

Abbreviations: CKD, chronic kidney disease; RBANS, Repeatable Battery for the Assessment of Neuropsychological Status; FCSRT, The Free and Cued Selective Reminding Test. CKD defined as eGFR <60 mL/min/1.73m<sup>2</sup>.

\*Trail Making Test  $\Delta$  = Trail Making Test Part B (sec) – Trail Making Test Part A (sec)

Continuous variables are represented as mean  $\pm$  standard deviation if normally distributed and median (interquartile range) otherwise.

**Supplementary Table 2.** MNI coordinates of key brain regions (peak voxels in clusters) contributing to the gray matter volume covariance network associated with Chronic Kidney Disease. Threshold  $Z = 1.96$ ,  $p < .05$ , 10 voxels (k).

| <b>Brain Region</b>              | <b>X</b> | <b>Y</b> | <b>Z</b> | <b>k</b> | <b>Z-value</b> |
|----------------------------------|----------|----------|----------|----------|----------------|
| <b>Positive</b>                  |          |          |          |          |                |
| <b>(relatively less atrophy)</b> |          |          |          |          |                |
| Supplementary Motor Area         | 13       | -13      | 60       | 192193   | 4.2964         |
| Cerebellum (VIII A)              | 1        | -80      | -46      | 68136    | 3.6607         |
| Pallidum                         | -17      | 1        | 10       | 2013     | 2.9622         |
| Inferior Occipital Gyrus         | 19       | -105     | -7       | 223      | 2.5542         |
| Temporal Pole                    | -23      | 5        | -50      | 193      | 2.2998         |
| Inferior Occipital Gyrus         | -32      | -100     | -10      | 164      | 2.4842         |
| Calcarine Sulcus                 | 4        | -101     | 0        | 162      | 2.5967         |
| Inferior Frontal Gyrus (orbital) | -55      | 38       | -9       | 138      | 2.2726         |
| Inferior Frontal Gyrus (orbital) | 12       | 31       | -8       | 93       | 2.5731         |
| Cingulum (anterior)              | 1        | 30       | 4        | 82       | 2.2374         |
| Middle Temporal Gyrus            | -68      | -21      | -26      | 65       | 2.2568         |
| Middle Frontal Gyrus (orbital)   | 51       | 52       | -8       | 46       | 2.2939         |
| Middle Occipital Gyrus           | -8       | -105     | 12       | 27       | 2.3724         |
| Inferior Frontal Gyrus (orbital) | 43       | 36       | -21      | 20       | 2.2472         |
| Inferior Frontal Gyrus (orbital) | 36       | 39       | 0        | 16       | 2.2949         |
| Inferior Frontal Gyrus (orbital) | 58       | 36       | -6       | 16       | 2.0873         |
| <b>Negative</b>                  |          |          |          |          |                |
| <b>(relatively more atrophy)</b> |          |          |          |          |                |
| Calcarine Sulcus                 | 15       | -61      | 9        | 291958   | -4.5668        |
| Inferior Frontal Gyrus (orbital) | 29       | 36       | -14      | 1238     | -3.8672        |
| Middle Frontal Gyrus (orbital)   | -26      | 37       | -15      | 1544     | -3.7436        |
| Inferior Temporal Gyrus          | 49       | 0        | -37      | 1195     | -3.0773        |
| Middle Occipital Gyrus           | -46      | -78      | 14       | 673      | -2.9853        |
| Cerebellum (Cruz II)             | 41       | -57      | -45      | 763      | -2.8315        |
| Cerebellum (IX)                  | -13      | -43      | -46      | 205      | -2.5723        |
| Superior Parietal                | 39       | -43      | 58       | 112      | -2.5312        |
| Cerebellum (IX)                  | 17       | -42      | -47      | 121      | -2.4597        |
| Precentral Gyrus                 | -47      | 2        | 44       | 24       | -2.3520        |
| Inferior Parietal                | 48       | -52      | 48       | 30       | -2.3302        |
| Calcarine Sulcus                 | -8       | -91      | -3       | 187      | -2.1947        |
| Postcentral Gyrus                | -55      | -8       | 23       | 142      | -2.1753        |
| Cerebellum (VIIB)                | -41      | -54      | -44      | 46       | -2.1041        |
| Middle Occipital Gyrus           | -46      | -77      | -1       | 13       | -2.0972        |
| Inferior Parietal                | -50      | -54      | 42       | 37       | -2.0902        |
| Rectus                           | 8        | 38       | -25      | 19       | -2.0821        |

**Supplementary Table 3.** MNI coordinates of key brain regions (peak voxels in clusters) contributing to the gray matter volume covariance network associated with the gait phenotype. Threshold  $Z = 1.96$ ,  $p < .05$ , 10 voxels (k)

| <b>Brain Region</b>              | <b>X</b> | <b>Y</b> | <b>Z</b> | <b>k</b> | <b>Z-value</b> |
|----------------------------------|----------|----------|----------|----------|----------------|
| <b>Positive</b>                  |          |          |          |          |                |
| <b>(relatively less atrophy)</b> |          |          |          |          |                |
| Superior Frontal Gyrus           | 33       | 51       | 39       | 602363   | 7.9227         |
| Parahippocampal Gyrus            | -28      | -22      | -21      | 26       | 2.1299         |
| Parahippocampal Gyrus            | 22       | -39      | -5       | 42       | 2.3310         |
| Caudate                          | -4       | 11       | 12       | 352      | 4.3203         |
| <b>Negative</b>                  |          |          |          |          |                |
| <b>(relatively more atrophy)</b> |          |          |          |          |                |
| Rolandic Operculum               | -40      | -20      | 15       | 419685   | -7.3831        |
| Middle Frontal Gyrus (orbital)   | -28      | 37       | -14      | 1156     | -4.7479        |
| Superior Frontal Gyrus (orbital) | -12      | 18       | -21      | 420      | -4.1703        |
| Inferior Frontal Gyrus (orbital) | 29       | 36       | -14      | 941      | -3.9336        |
| Inferior Temporal Gyrus          | 49       | 1        | -37      | 1071     | -3.9262        |
| Cerebellum (VIII)                | -5       | -70      | -40      | 2946     | -3.4757        |
| Cerebellum (IX)                  | -13      | -44      | -47      | 260      | -3.2624        |
| Cerebellum (Crus II)             | -29      | -79      | -38      | 1047     | -3.2508        |
| Fusiform Gyrus                   | -27      | -8       | -39      | 131      | -2.8090        |
| Inferior Temporal Gyrus          | -59      | -50      | -9       | 68       | -2.6650        |
| Superior Frontal Gyrus           | 25       | 24       | 46       | 171      | -2.6241        |
| Inferior Temporal Gyrus          | 63       | -28      | -19      | 48       | -2.5278        |
| Cerebellum (Crus II)             | -42      | -51      | -43      | 62       | -2.2085        |
| Superior Parietal                | -16      | -69      | 47       | 42       | -2.1997        |
| Cerebellum (IX)                  | 16       | -43      | -47      | 15       | -2.1126        |
| Precentral Gyrus                 | 33       | -3       | 51       | 20       | -2.1088        |

## **Supplementary Appendix 1. MRI pre-processing pipeline and multivariate analyses.**

### *MRI Acquisition and Pre-processing*

Standard three-dimensional T1-weighted (structural) MRI images were obtained with a Philips 3T MRI scanner (Achieva Quasar TX; Philips Medical Systems, Best, Netherlands; TR/TE of 9.9/4.6 ms., 240 mm<sup>2</sup> FOV, 240 x 240 x 220 matrix and 1 mm voxel size) housed at the Gruss Magnetic Resonance Research Center at Albert Einstein College of Medicine (Bronx, NY, USA). T1-weighted images were first manually re-oriented to the anterior commissure – posterior commissure line and then pre-processed using SPM12 (Wellcome Department of Cognitive Neurology), which was implemented with MATLAB R2015a (Mathworks, Natick, MA). Each structural MRI image was analyzed using Voxel-Based Morphometry (VBM) and segmented into Gray Matter (GM), White Matter (WM), and Cerebrospinal Fluid (CSF), using a unified segmentation procedure and Diffeomorphic Anatomical Registration Through Exponentiated Line Algebra (DARTEL) (30). This VBM technique improves inter-subject alignment by modeling the shape of the brain using three parameters for each voxel. Gray matter and white matter is simultaneously aligned to produce a study-specific and increasingly crisp template to which the data are iteratively aligned. For each participant, a GM map, a WM map and a CSF map was created in the same space as the original T1-weighted image, where each voxel is assigned a probability value. These probability maps were manually examined to ensure proper segmentation, and then spatially normalized into Montreal Neurologic Institute (MNI) space. Finally, these

probability maps were spatially smoothed with an isotropic Gaussian kernel, full-width-at-half-maximum = 8 mm.

### *Multivariate Analyses*

Gray matter probability maps were first masked with a gray matter mask supplied by SPM12 to only include voxels with > 20% probability of being gray matter and linearly transformed. A PCA was then performed in order to generate a set of principal components, and their associated participant-specific (or pattern) expression scores. Participant-specific expression scores reflect the degree to which a participant displays a particular component or pattern. The expression scores of each PC were examined for potential outliers. The gray matter volume covariance patterns associated with CKD and gait phenotype/severity were then computed by regressing the participant-specific factor scores from the best linear combination of principal components (PCs) – selected using the Akaike information criteria (32) – against CKD and gait phenotype. The stability of the voxels in each GM volume covariance pattern were then tested using 1,000 bootstrap resamples (33). Voxels with bootstrap samples of  $[Z] > 1.96$  and  $p < 0.05$  were considered significant. These group-level covariance analyses allowed us to identify key ‘nodes’ in the gray matter volume covariance ‘networks’ associated with CKD and gait severity (34-38). This multivariate analysis assigns positive and negative weightings (or loadings) to each voxel (or variable) included in the analysis. In the current study, positively weighted regions will be interpreted as regions that have relatively more volume in individuals with CKD and gait severity, while negatively weighted regions will be interpreted as regions that have relatively less volume

(atrophy) in CKD and gait severity. It is important to note, however, that both positively and negatively weighted regions contribute to the derived gray matter covariance patterns that are associated with CKD and gait severity.
